# Supplementary material
Source: MDPI journal article supplement (https://www.mdpi.com/2218-0532/92/3/49)
Supplement: s1 [file s1]

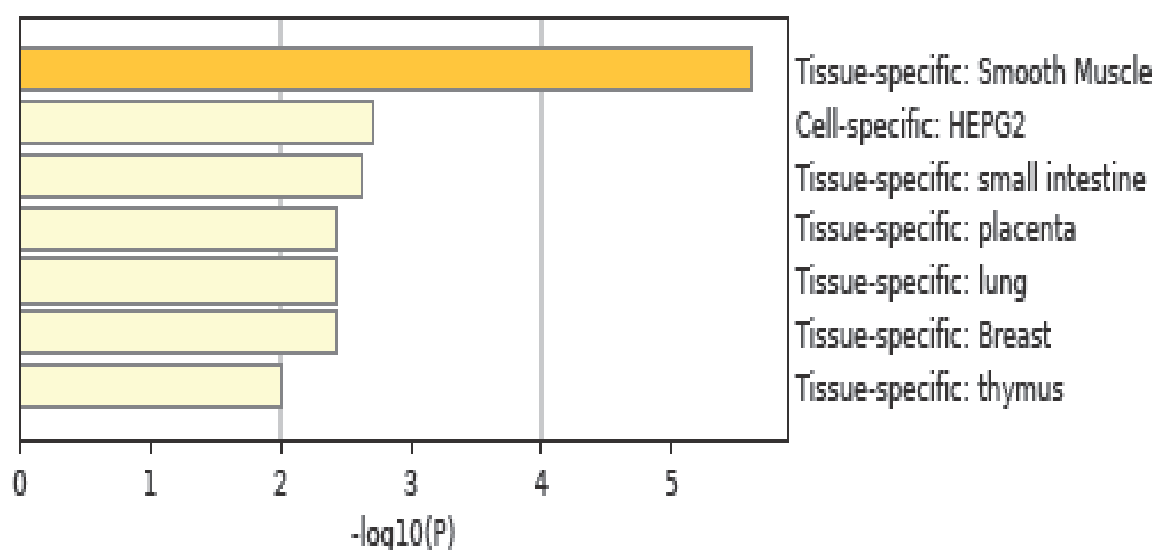

Figure S1: Tissue specific\_PaGenBase

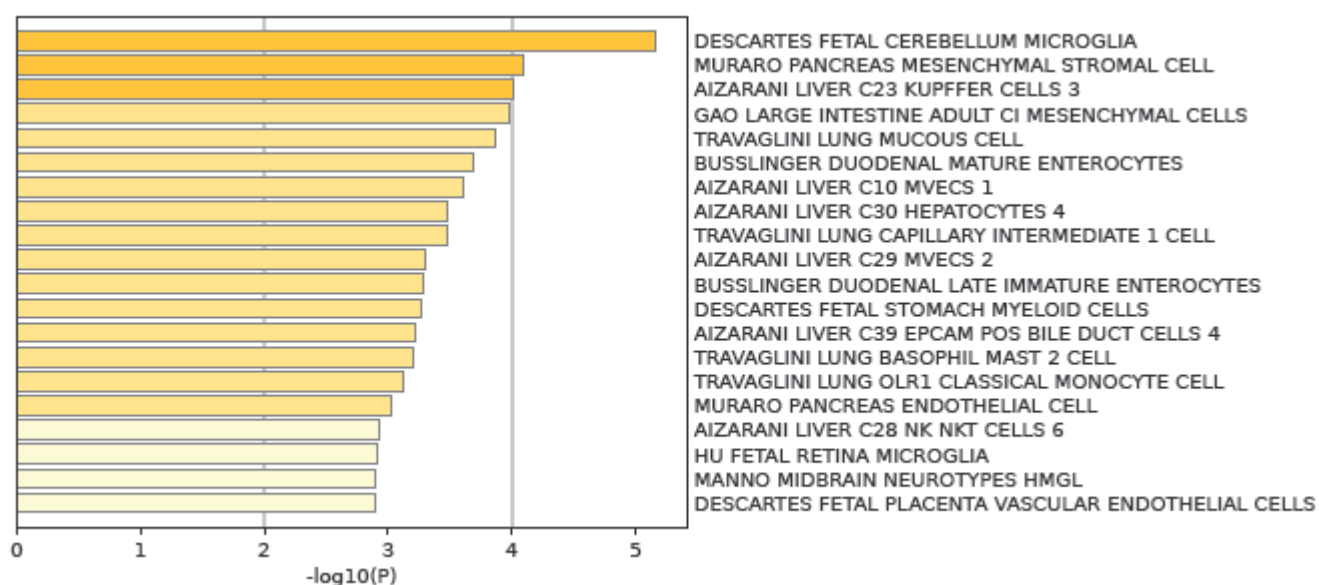

Figure S2: Cellular Distribution

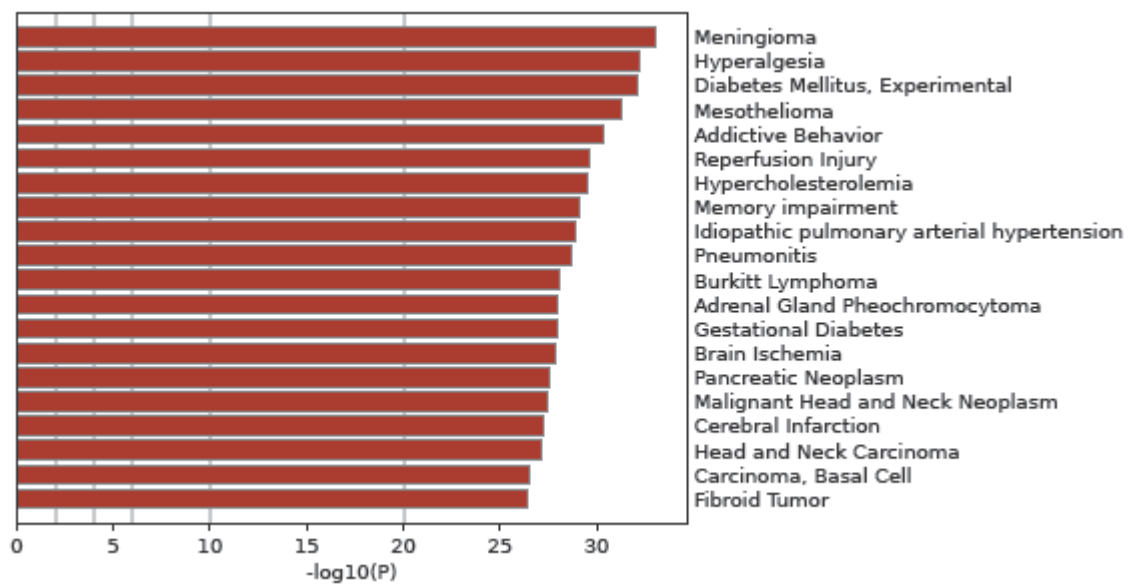

Figure S3: Distribution in different cancer type
